# Supplementary material for: pH Dependent self-assembly of dimetallic lanthanide complexes
Source: Royal Society of Chemistry journal article supplement (doi:10.1039/b412329h), 2004-11-19

Supplementary figure 1: showing the change of form and increase in intensity of the europium centred emission between pH 2 (blue line, lowest intensity) and pH 8 (brown line, maximum intensity).


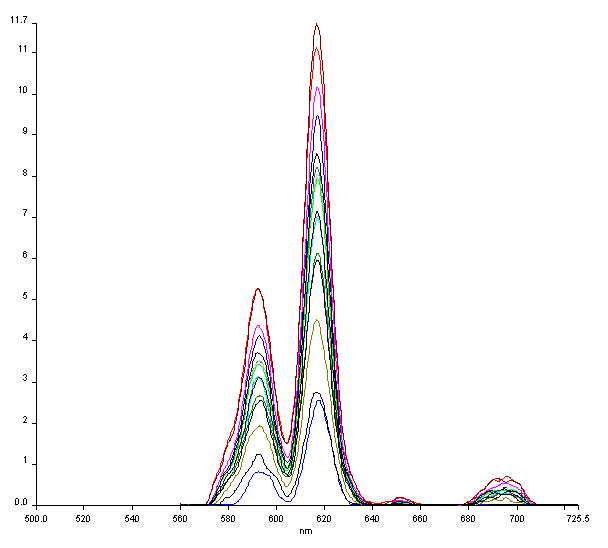

Supplement: b412329h.doc [file b412329h.doc]
